# Supplementary material for: An amperometric sensor for detection of tryptophan based on a pristine multi-walled carbon nanotube/graphene oxide hybrid
Source: Royal Society of Chemistry journal article supplement (doi:10.1039/c5an00410a), 2015-01-01
Supplement: c5an00410a1.pdf [file c5an00410a1.pdf]

## Amperometric sensor for detection of tryptophan based on pristine multi-walled carbon nanotubes/graphene oxide hybrid

Junfeng Han,<sup>‡,ab</sup> Qingqing Wang,<sup>‡,a</sup> Junfeng Zhai,<sup>a</sup> Lei Han<sup>a</sup> and Shaojun Dong<sup>a\*</sup>

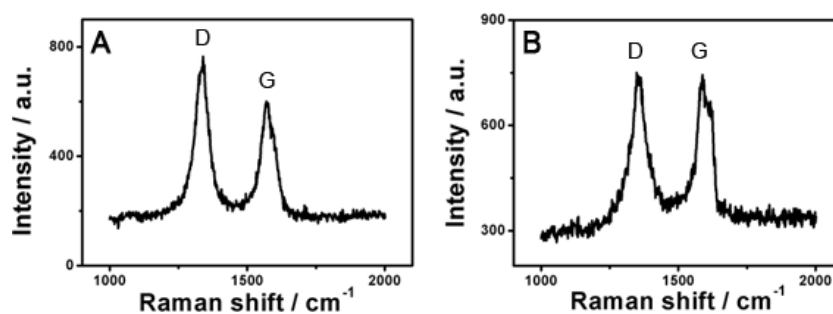

**Fig. S1.** Raman spectra of AMWCNTs (A) and pMWCNTs (B).

The surface-enhanced Raman scattering (SERS) spectra of the AMWCNTs (A) and pMWCNTs (B) are shown as Fig. S1. It is clear that the AMWCNTs have a larger D/G ratio, indicating there are more defect sites at the AMWCNTs surfaces after acid treatment. The AMWCNTs and pMWCNTs were used in the work to prepared the hybrid with graphene oxide, which displaying different electrochemical behaviors.
